# Supplementary material for: ER tethering and active transport govern condensate diffusion during hyperosmotic stress
Source: Research Square preprint supplement (doi:10.21203/rs.3.rs-6895807/v1), 2025-07-18
Supplement: Supplementary file 1 [file 26557ca585d33000fc52cd28.pdf]

## Supplementary Information

# ER tethering and active transport govern condensate diffusion during hyperosmotic stress

Bisal Halder<sup>1,2#</sup>, Guoming Gao<sup>1,3#</sup>, Armin Ahnoud<sup>1</sup>, Shelby Stakenas<sup>1,2</sup>, Emily R. Sumrall<sup>1</sup> and Nils G. Walter<sup>1,2\*</sup>

<sup>1</sup>Center for RNA Biomedicine, University of Michigan, Ann Arbor, MI 48109, USA

<sup>2</sup>Department of Chemistry, University of Michigan, Ann Arbor, MI 48109, USA

<sup>3</sup>Current Address: Division of Biology and Biological Engineering, California Institute of Technology, Pasadena, CA 91125, USA

#These authors contributed equally to this work

\*Correspondence: [nwalter@umich.edu](mailto:nwalter@umich.edu)

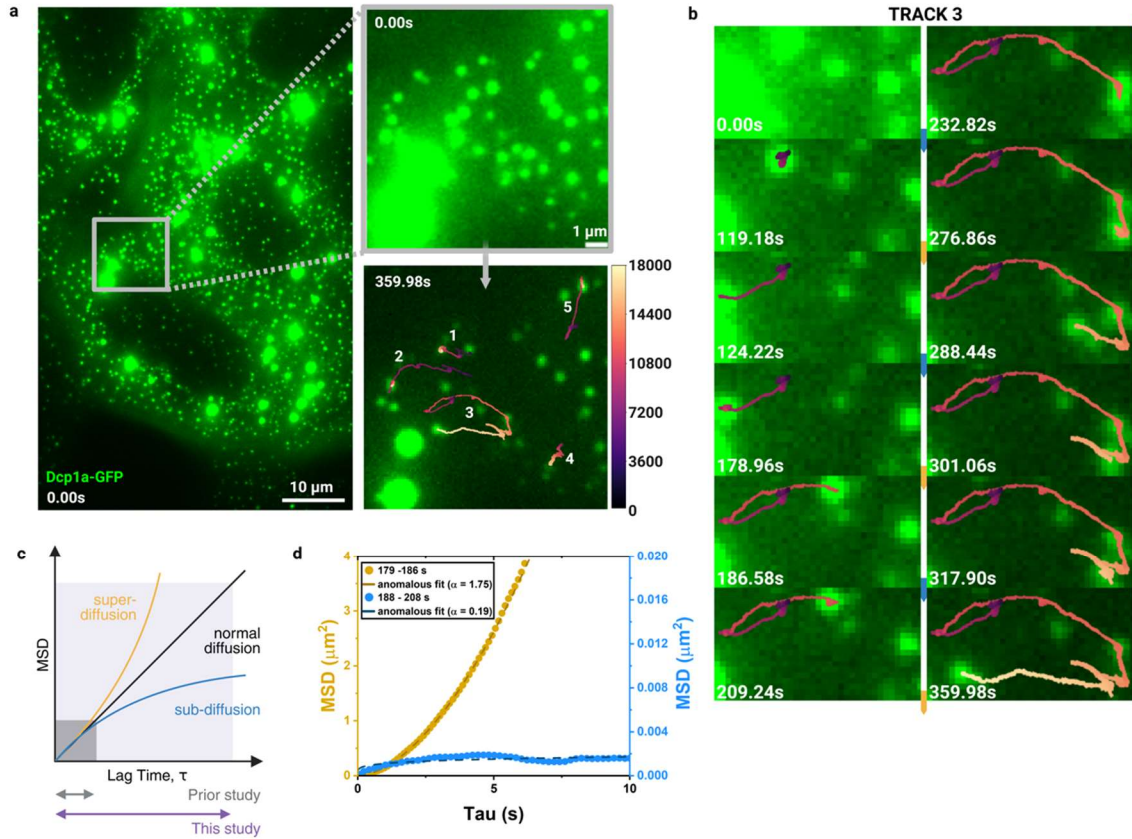

**Fig. S1 | Dual-mode dynamics of hyperosmotic phase separation (HOPS) condensates reproduced under 50 Hz imaging frequency.**

**a** | Representative images of U2OS cells expressing eGFP-labeled DCP1A under hyperosmotic stress conditions. Enlarged views emphasize trajectories of hyperosmotic stress-induced HOPS condensates, where individual particle locations throughout a trajectory are colored by frame number. **b** | Time-lapse zoomed-in images of a representative HOPS condensate trajectory (#3 shown in **a**), showing both predominant sub diffusion and the occasional super diffusion. **c** | The mean squared displacement (MSD) as a function of lag time ( $\tau$ ) demonstrates the ability of extended time scales to differentiate between various diffusion modes. **d** | Comparison of MSD- $\tau$  curves between the sub-diffusive portions and the super diffusion portions of the same set of HOPS condensate trajectories.

**Table S1 | Theoretical and experimentally determined diffusion coefficient of HOPS condensate and GEM particles from four representative particles each**

|                  | <b>Radius (nm)</b> | <b>Theoretical D<br/>(<math>\mu\text{m}^2/\text{s}</math>)</b> | <b>Experimental D<br/>(<math>\mu\text{m}^2/\text{s}</math>)</b> |
|------------------|--------------------|----------------------------------------------------------------|-----------------------------------------------------------------|
| HOPS Particle #1 | 80.84              | 0.0394                                                         | 0.000232                                                        |
| HOPS Particle #2 | 186.70             | 0.0170                                                         | 0.000189                                                        |
| HOPS Particle #3 | 272.16             | 0.0117                                                         | 0.000319                                                        |
| HOPS Particle #4 | 313.11             | 0.0101                                                         | 0.000118                                                        |
| GEM Particle #1  | 40                 | 0.0797                                                         | 0.136530                                                        |
| GEM Particle #2  | 40                 | 0.0797                                                         | 0.017967                                                        |
| GEM Particle #3  | 40                 | 0.0797                                                         | 0.022489                                                        |
| GEM Particle #4  | 40                 | 0.0797                                                         | 0.014519                                                        |
